# Supplementary material for: Rational Design of Lipase ROL to Increase Its Thermostability for Production of Structured Tags
Source: MDPI journal article supplement (doi:10.3390/ijms23179515), 2022-08-23
Supplement: s1 [file s1]

MVPVSGKSGSSTTAVSASDNSALPPLISSRCAPPSNKGSKSDLQAEPYYMQKNTEWYESHGGNLT  
SI  
GKRDDNLVGGMTLDLPSDAPPISLSGSTNSASDGGKVAAATTAQIQEFTKYAGIAATAYCRSVVPG  
NKWDCVQCQKWVPDGGKIITFTSLLSDTNGYVLRSDKQKTIYLVFRGTNSFRSAITDIVFNFS  
DYKPV  
KGAKVHAGFLSSYEQVVNDYFPVIEQLTANPTYKVIVTGHS LGGAQALLAGMDLYQREPR  
LSPK  
NLSIFTVGGPRVGNPTFAYYVESTGIPFQRTVHKRDIVPHVPPQSFGFLHPGVESWIKSGT  
SNVQICTS  
EIETKDCSNSIVPFTSLLDHLSYFDINEGSCL

**Figure S1.** Sequence of wild-type ROL.

CTTTGTAGCCTTAGACATGACTGTTCTCAGTTCAAGTTGGGCACTTACGAGAAGACCGGTCTTGCTAGA  
TTCTAATCAAGAGGATGTCAGAATGCCATTGCTGAGAGATGCAGGCTTCATTTTTGATACTTTTTTATT  
TGTAACCTATATAGTATAGGATTTTTTTTGTCATTTTGTTTCTTCTCGTACGAGCTTGCTCCTGATCAGCCT  
ATCTCGCAGCTGATGAATATCTTGTGGTAGGGTTTGGGAAAATCATTTCGAGTTTGATGTTTTTCTTGGA  
TTTCCCCTCTCTCAGAGTACAGAAGATTAAAGTGAGACTTTCGTTTGTCGGATCCGCTGGGATCCTA  
ATGCGGTAGTTTATCACAGTTAAATTGCTAACGCAGTCAGGCACCGTGTATGAAATCTAACAATGCGCTC  
ATCGTCATCCTCGGCACCGTCACCCTGGATGCTGTAGGCATAGGCTTGGTTATGCCGGTACTGCCGGGCC  
TCTTGCGGGATATCGTCCATTCCGACAGCATCGCCAGTCACTATGGCGTGTCTAGCGCTATATGCGTT  
GATGCAATTTCTATGCGCACCCGTTCTCGGAGCACTGTCCGACCGCTTGGCCGCCGCCAGTCCTGCTC  
GCTTCGCTACTTGAGCCACTATCGACTACGCGATCATGGCGACCACACCCGTCCTGTGGATCTATCGAA  
TCTAAATGTAAGTTAAAATCTCTAAATAATTAATAAGTCCAGTTTCTCCATACGAACCTTAACAGCAT  
TGCGGTGAGCATCTAGACCTTCAACAGCAGCCAGATCCATCACTGCTTGGCCAATATGTTTCAGTCCCTC  
AGGAGTTACGTCTTGTGAAGTGATGAACTTCTGGAAGGTTGCAGTGTTAACTCCGCTGTATTGACGGGCA  
TATCCGTACGTTGGCAAAGTGTTGGTTGGTACCGGAGGAGTAATCTCCACAACCTCTCTGGAGAGTAGGCA  
CCAACAAACACAGATCCAGCGTGTGTACTTGATCAACATAAGAAGAAGCATTCTCGATTGTCAGGATC  
AAGTGTTTCAGGAGCGTACTGATTGGACATTTCCAAAGCCTGCTCGTAGGTTGCAACCGATAGGGTTGTAG  
AGTGTGCAATACACTTGCCTACAATTTCAACCCTTGGCAACTGCACAGCTTGGTTGTGAACAGCATCTTC  
AATTCTGGCAAGCTCCTTGTCTGTCATATCGACAGCCAACAGAATCACCTGGGAATCAATACCATGTTCA  
GCTTGAGACAGAAGGTCTGAGGCAACGAAATCTGGATCAGCGTATTTATCAGCAATAACTAGAACTTCA  
GAAGGCCACAGCAGGCATGTCAATACTACACAGGGCTGATGTGTCATTTGAACCATCATCTTGGCAGCA  
GTAACGAAGTGGTTTCTTGACCAAATATTTTGTACACTTAGGAACAGTTTCTGTTCCGTAAGCCATAG  
CAGCTACTGCCTGGGCGCCTCTGCTAGCACGATACACTTAGCACCAACCTTGTGGGCAACGTAGATGA  
CTTCTGGGGTAAGGGTACCATCCTTCTTAGGTGGAGATGCAAAAACAATTTCTTTGCAACCAGCAACTTT  
GGCAGGAACACCCAGCATCAGGGAAGTGGAAGGCAGAATTGCGGTTCCACCAGGAATATAGAGGCCA  
ACTTTCTCAATAGGTCTTGCAAAACGAGAGCAGACTACACCAGGGCAAGTCTCAACTTGCAAAAGTCTCC  
GTTAGTTGAGCTTCATGGAATTTCTGACGTTATCTATAGAGAGATCAATGGCTCTCTTAACGTTATCTGG  
CAATTGCATAAGTTTCTCTGGGAAAGGAGCTTCTAACACAGGTGTCTTCAAAGCGACTCCATCAAACCTG  
GCAGTTAGTTCTAAAAGGGCTTTGTACCATTTTGTACGAACATTGTGACAATTGGTTTGACTAATTCCAT  
AATCTGTTCCGTTTTCTGGATAGGACGACGAAGGGCATCTTCAATTTCTTGTGAGGAGGCCTTAGAAACG  
TCAATTTTGCACAATTCAATACGACCTTCAGAAGGGACTTCTTTAGGTTTGGATTCTCTTTAGGTTGTTCC  
TTGGTGTATCCTGGCTTGGCATCTCCTTCTCTTCTAGTGACCTTTAGGGACTTCATATCCAGGTTTCTCTCC  
ACCTCGTCCAACGTACACCGTACTTGGCACATCTAATAATGCAAAATAAAATAAGTCAGCACATTCC  
CAGGCTATATCTTCTTGGATTTAGCCTCGGCCAACTCGTCGGCTCCTCCCTAATTTTAGCGTTCAACAA  
AACTTCGTCTGCAATAACCGTTTGGTATAAGAACCTTCTGGAGCATTGCTCTTACGATCCCACAAGGTG  
GCTTCCATGGCTCTAAGACCTTTGATTGGCCAAAACAGGAAGTGCGTTCCAAGTGACAGAAACCAACA  
CCTGTTTGTCAACCACAAATTTCAAGCAGTCTCCATCACAATCCAATTCGATACCCAGCAACTTTTGAG  
TTGCTCCAGATGTAGCACCTTTATACCACAAACCGTGACGACGAGATTGGTAGACTCCAGTTTGTGTCTT  
TATAGCCTCCGGAATAGACTTTTTGGACGAGTACACCAGGCCAACGAGTAATTAGAAGAGTCAGCCAC  
CAAAGTAGTGAATAGACCATCGGGGCGGTCACTAGTCAAAGACGCCAACAAATTTCACTGACAGGGA  
ACTTTTTGACATCTTCAGAAAGTTCGTATTCACTAGTCAATTGCCGAGCATCAATAATGGGGATTATACC  
AGAAGCAACAGTGGAAGTCACATCTACCAACTTTGCAGTCTCAGAAAAAGCATAAACAGTTCTACTACC  
GCCATTAGTGAAACTTTTCAAATCGCCCAGTGGAGAAGAAAAAGGCACAGCGATACTAGCATTAGCGG  
GCAAGGATGCAACTTTATCAACCAGGGTCTATAGATAACCCTAGCGCCTGGGATCATCCTTTGGACAA  
CTCTTTCTGCCAAATCTAGGTCCAAAATCACTTCATTGATACCATTATTGTACAACCTGAGCAAGTTGTCTG  
ATCAGTCTCTCAAATTGGTCTCTGTAAACGGATGACTCAACTTGACATTAACTTGAAGCTCAGTCGATT  
GAGTGAACCTTGATCAGGTTGTGCAGCTGGTCAGCAGCATAGGGAAACACGGCTTTTCTACCAAACCTCA  
AGGAATTATCAAACCTCTGCAACACTTGGTATGCAGGTAGCAAGGGAAATGTCATACTTGAAGTCGGAC  
AGTGAGTGTAGTCTTGAGAAATTCTGAAGCCGTATTTTATTATCAGTGAGTCAGTCATCAGGAGATCCT  
CTACGCCGGACGCATCGTGGCCGGCATCACCGGCGCCACAGGTGCGGTTGCTGGCGCCTATATCGCCGA  
CATCACCGATGGGGAAGATCGGGCTCGCCACTTCGGGCTCATGAGCGCTTGTTCGGCGTGGGTATGGTG  
GCAGGCCCCGTGGCCGGGGGACTGTTGGGCGCCATCTCCTTGATGCACCATTCGGGAGACTAACCCAC  
ACACCATAGCTTCAAAATGTTTCTACTCCTTTTTTACTCTTCAGATTTTCTCGGACTCCGCGCATCGCCGT  
ACCACTTCAAAACACCCAAGCACAGCATACTAAATTTCCCTCTTTCTCTCTCTAGGGTGTCTGTTAATTAC  
CCGTAATAAGGTTTGGAAAAGAAAAAAGACCGCCTCGTTTCTTTTCTTCGTGAAAAAAGGCAATA  
AAAATTTTATCACGTTTCTTTTCTTGAAAATTTTTTTTTTGATTTTTTCTCTTCGATGACCTCCCATTG  
ATATTTAAGTTAATAAACGGTCTTCAATTTCTCAAGTTTCAGTTTCATTTTTCTTGTCTATTACAACTTTT  
TTACTTCTTGCTCATTAGAAAGAAAGCATAGCAATCTAATCTAAGGGGCGGTGTTGACAATTAATCATCG

GCATAGTATATCGGCATAGTATAATACGACAAGGTGAGGAACTAAACCATGGCCAAGTTGACCAGTGC  
CGTTCCGGTGCTACCGCGCGGACGTCGCCGGAGCGGTGAGTTCTGGACCGACCGGCTCGGGTTCTC  
CCGGGACTTCGTGGAGGACGACTTCGCCGGTGTGGTCCGGGACGACGTGACCCTGTTTCATCAGCGCGGT  
CCAGGACCAGGTGGTGCCGACAAACACCTGGCCTGGGTGTGGGTGCGCGGCCTGGACGAGCTGTACG  
CCGAGTGGTTCGGAGGTCGTGTCCACGAACTTCCGGGACGCCTCCGGGCCGGCCATGACCGAGATCGGCC  
AGCAGCCGTGGGGGCGGGAGTTCGCCCTGCGCGACCCGGCCGGCAACTGCGTGCCTTCGTGGCCGAG  
GAGCAGGACTGACACGTCCGACGGCGGCCACGGGTCCCAGGCCTCGGAGATCCGTCCCCCTTTTCCTT  
TGTCGATATCATGTAATTAGTTATGTCACGCTTACATTACGCCCTCCCCCACATCCGCTCTAACCGAAA  
AGGAAGGAGTTAGACAACCTGAAGTCTAGGTCCCTATTTATTTTTTATAGTTATGTTAGTATTAAGAAC  
GTTATTTATATTTCAAATTTTTCTTTTTTTCTGTACAGACGCGTGTACGCATGTAACATTATACTGAAAAC  
CTTGCTTGAGAAGGTTTTGGGACGCTCGAAGGCTTTAATTTGCAAGCTGGAGACTAACATGTGAGCAAA  
AGGCCAGCAAAAGGCCAGGAACCGTAAAAAGGCCGCGTGTGCTGGCGTTTTTCCATAGGCTCCGCCCCC  
TGACGAGCATCACAAAATCGACGCTCAAGTCAGAGGTGGCGAAACCCGACAGGACTATAAAGATACC  
AGGCGTTTTCCCCCTGGAAGCTCCCTCGTGCCTCTCCTGTTCGACCCCTGCCGCTTACCGGATACCTGTCC  
GCCTTTCTCCCTTCGGGAAGCGTGGCGCTTTCTCAATGCTCACGCTGTAGGTATCTCAGTTCCGTGTAGGT  
CGTTCGCTCCAAGCTGGGCTGTGTGCACGAACCCCCCGTTACGCCGACCGCTGCGCCTTATCCGGTAAC  
TATCGTCTTGAGTCCAACCCGGTAAGACACGACTTATCGCCACTGGCAGCAGCCACTGGTAACAGGATT  
AGCAGAGCGAGGTATGTAGGCGGTGCTACAGAGTTCTTGAAGTGGTGGCCTAACTACGGCTACACTAGA  
AGGACAGTATTTGGTATCTGCGCTCTGCTGAAGCCAGTTACCTTCGGAAAAAGAGTTGGTAGCTCTTGAT  
CCGGCAAAACAAACCACCGCTGGTAGCGGTGGTTTTTTTTGTTTGCAAGCAGCAGATTACGCGCAGAAAAA  
AAGGATCTCAAGAAGATCCTTTGATCTTTTTCTACGGGAACGTTTTTGTAGAAATGTCTTGGTGTCTCGTC  
CAATCAGGTAGCCATCTCTGAAATATCTGGCTCCGTTGCAACTCCGAACGACCTGCTGGCAACGTAAAA  
TTCTCCGGGGTAAAACTTAAATGTGGAGTAATGGAACCAGAAACGTGTCTTCCCTTCTCTCTCCTTCCAC  
CGCCCGTTACCGTCCCTAGGAAATTTTACTCTGCTGGAGAGCTTCTTCTACGGCCCCCTTGCAGCAATGCT  
CTTCCCAGCATTACGTTGCGGGTAAAACGGAGGTGCTGTACCCGACCTAGCAGCCCAGGGATGGAAAAG  
TCCCGGCCGTCGCTGGCAATAATAGCGGGCGGACGCATGTCATGAGATTATTGGAAACCACCAGAATCG  
AATATAAAAGGCGAACACCTTTCCCAATTTTGGTTTCTCCTGACCCAAAGACTTTAAATTTAATTTATTTG  
TCCCTATTTCAATCAATTGAACAACCTATCTATGAGATTTCCCTTCAATTTTACTGCTGTTTTATTGCGAGCA  
TCCTCCGCATTAGCTGCTCCAGTCAACACTACAACAGAAGATGAAACGGCACAAATTCGGGTGAAGCT  
GTCATCGGTTACTCAGATTTAGAAGGGGATTTGATGTTGCTGTTTTGCCATTTTCCAACAGCACAAATA  
ACGGGTTATTGTTTATAAATACTACTATTGCCAGCATTGCTGCTAAAGAAGAAGGGGTATCTCTCGAGAA  
AAGAGAGGCTGAAGCTGTGATGGTTCCAGTTTCTGGTAAGTCTGGTTCCTCCACTACTGCTGTTTCTGCTT  
CTGACAACTCTGCCTTGCCACCATTGATCTCTTCTAGATGTGCTCCACCATCCAACAAGGGTTCTAAGTCT  
GACTTGCAAGCCGAGCCTTACTACATGCAAAAGAACACTGAATGGTACGAGTCCCACGGTGGTAACCTG  
ACTTCCATCGGTAAGAGAGATGACAACCTGGTTGGTGGTATGACCTGGATTGCCATCTGACGCTCCTC  
CAATTTCTTTGTCCGTTCTACCAACTCTGCTTCCGATGGTGGTAAAGTTGCTGCTGCTACTACTGCTCAG  
ATCCAAGAGTTCACTAAGTACGCTGGTATCGCTGCTACTGCCTACTGTAGATCTGTTGTCCCAGGTAACA  
AGTGGGACTGTGTTCACTGTCAAAAGTGGGTTCAGACGGTAAGATTATCACCACCTTCACTTCCCTGTT  
GTCCGACACTAACGGTTACGTTTTGAGATCCGACAAGCAAAAGACCATCTACCTGGTGTTCAGAGGAAC  
TAACTCCTTCAGATCCGCTATCACCGACATCGTGTCAACTTCTCTGACTACAAGCCAGTCAAGGGTGT  
AAGGTTACGCTGGTTTTTTGTCTCTTACGAGCAGGTTGTGAACGACTACTTCCAGTTATCCAAGAGC  
AGTTGACTGCTTATCCAACCTACAAGGTTATCGTTACCGGTCACCTCTTGGTGGTGTCAAGCTTTGTTG  
GCTGGTATGGACTTGTACCAGAGAGAGCCAAGATTGTCCCCAAAGAACTTGTCCATCTACACCGTTGGT  
GGTCCAAGAGTCGGTAACCCAACCTTCGCTTACTACGTTTGTCTCCACTGGTATCCCATTCCATAGAACCG  
TTCACAAGAGAGACATCGTTCCACACTTGCCACCTCAATCCTTTGGTTTCTTGCAACCAGGTGTTGAGTCC  
TGGATTAAGTCCGGTACTTCCAACGTTTCAATCTGCACTTCTGTCATCGAGACTAAGGACTGTTCCAAC  
CTATCGTCCCTTCACTTCTTGTGTTGACCACTTGTCTTCTCGGTATTAACGAGGGTTTGTGTTTGTAG

**Figure S2.** Vector sequence of pFAi2-GAPp-ROL.

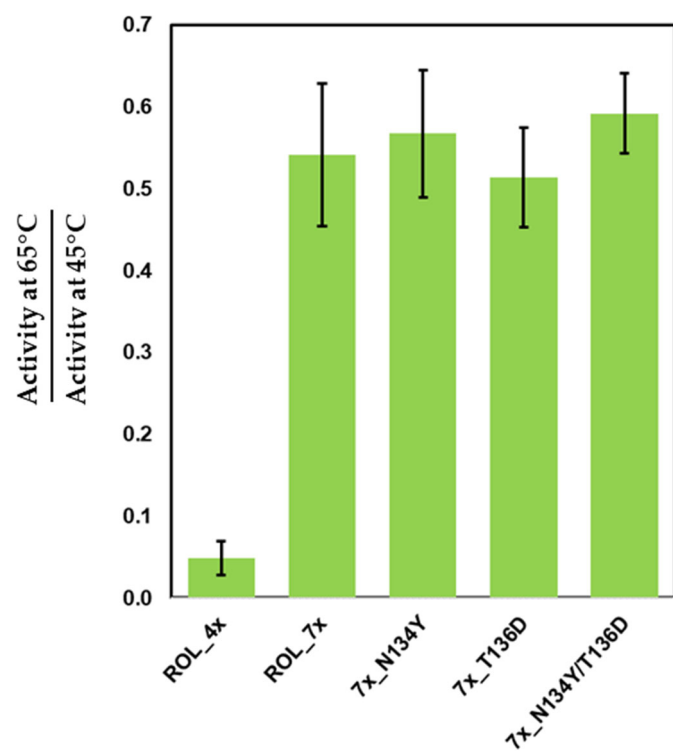

**Figure S3.** DTNB assay to compare the thermostability of ROL\_4x, ROL\_7x and ROL\_7x mutants.

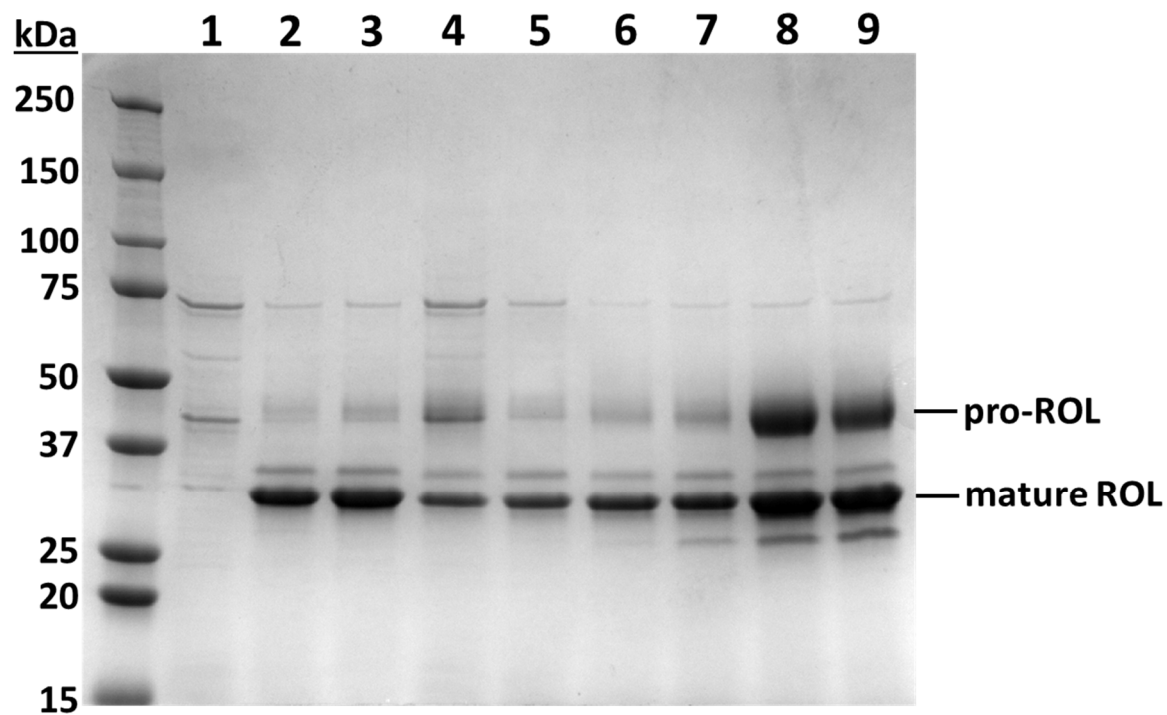

**Figure S4.** SDS-PAGE analysis of the ROL mutants expressed from *P.pastoris*. (1) Negative Control. (2,3) Wild-type ROL. (4,5) ROL\_4x. (6,7) ROL\_7x. (8,9) ROL\_10x.

**Table S1.** Relative activity and fold improvement of the single mutants of ROL\_4x measured at 60°C and 45°C.

| <b>Mutant</b> | <b>Relative activity<br/>(60°C/45°C)</b> | <b>Fold Improvement</b> |
|---------------|------------------------------------------|-------------------------|
| ROL_4x        | 24%                                      | 1.0                     |
| ROL_4x_A8E    | 38%                                      | 1.6                     |
| ROL_4x_S31D   | 22%                                      | 0.9                     |
| ROL_4x_S114N  | 33%                                      | 1.4                     |
| ROL_4x_N134Y  | 52%                                      | 2.2                     |
| ROL_4x_T136D  | 43%                                      | 1.8                     |
| ROL_4x_P163K  | 34%                                      | 1.4                     |
| ROL_4x_F173Y  | 43%                                      | 1.8                     |
| ROL_4x_Y187N  | 30%                                      | 1.2                     |
| ROL_4x_G193K  | 30%                                      | 1.2                     |
| ROL_4x_Q197H  | 55%                                      | 2.3                     |
| ROL_4x_Q197Y  | 47%                                      | 1.9                     |
| ROL_4x_G228D  | 34%                                      | 1.4                     |
| ROL_4x_G228S  | 22%                                      | 0.9                     |
| ROL_4x_S267L  | 57%                                      | 2.4                     |

**Table S2.** Relative activity and fold improvement of the single mutants of ROL\_4x and ROL\_7x measured at 65°C and 45°C.

| <b>Mutant</b> | <b>Relative activity<br/>(65°C/45°C)</b> | <b>Fold Improvement</b> |
|---------------|------------------------------------------|-------------------------|
| ROL_4x        | 6%                                       | 1.0                     |
| ROL_4x_N134Y  | 16%                                      | 2.8                     |
| ROL_4x_T136D  | 3%                                       | 0.6                     |
| ROL_4x_F173Y  | 5%                                       | 0.9                     |
| ROL_4x_Q197H  | 9%                                       | 1.6                     |
| ROL_4x_Q197Y  | 3%                                       | 0.5                     |
| ROL_4x_S267L  | 13%                                      | 2.3                     |
| ROL_7x        | 45%                                      | 8.0                     |

**Table S3.** Relative activity and fold improvement of the single mutants of ROL\_7x measured at 67°C and 45°C.

| <b>Mutant</b> | <b>Relative activity<br/>(67°C/45°C)</b> | <b>Fold Improvement</b> |
|---------------|------------------------------------------|-------------------------|
| ROL_7x        | 19%                                      | 1.0                     |
| ROL_7x_A7R    | 32%                                      | 1.7                     |
| ROL_7x_L113Y  | 26%                                      | 1.3                     |
| ROL_7x_Q150F  | 3%                                       | 0.2                     |
| ROL_7x_Q150H  | 4%                                       | 0.2                     |
| ROL_7x_G155A  | 15%                                      | 0.8                     |
| ROL_7x_S171F  | 16%                                      | 0.8                     |
| ROL_7x_V175F  | 81%                                      | 4.2                     |
| ROL_7x_G177C  | 125%                                     | 6.4                     |
| ROL_7x_T199V  | 24%                                      | 1.2                     |
| ROL_7x_F216Y  | 52%                                      | 2.7                     |
| ROL_7x_S223Y  | 4%                                       | 0.2                     |
| ROL_7x_F261Y  | 3%                                       | 0.2                     |

**Table S4.** Relative activity and fold improvement of the single mutants of ROL\_7x and ROL\_10x measured at 70°C and 45°C.

| <b>Mutant</b> | <b>Relative activity<br/>(70°C/45°C)</b> | <b>Fold Improvement</b> |
|---------------|------------------------------------------|-------------------------|
| ROL_7x        | 2%                                       | 1.0                     |
| ROL_7x_V175F  | 10%                                      | 4.5                     |
| ROL_7x_G177C  | 14%                                      | 6.1                     |
| ROL_7x_F216Y  | 3%                                       | 1.2                     |
| ROL_10x       | 121%                                     | 54.4                    |
